# Supplementary material for: Gut microbiota in patients after surgical treatment for colorectal cancer
Source: PubMed Central journal article supplement (PMC7379540; doi:10.1111/1462-2920.14498), 2018-12-19

Receiver operating characteristic of selected genus

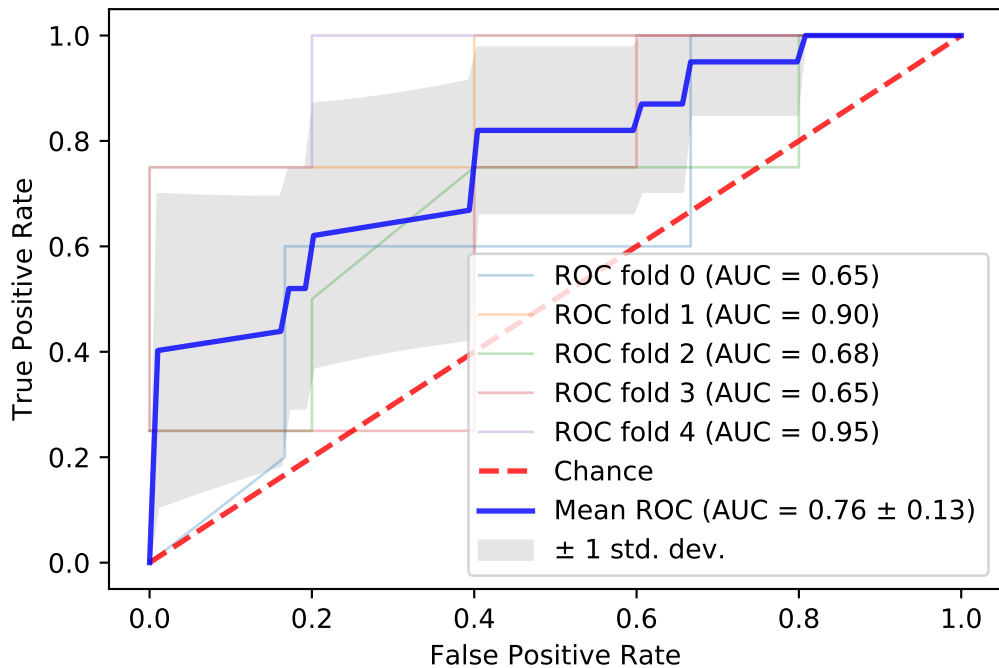

Supplement: EMI-21-772-s009.pdf [file EMI-21-772-s009.pdf]
